# Supplementary material for: Massage therapy can effectively relieve cancer pain: A meta-analysis
Source: PubMed Central journal article supplement — Medicine (Baltimore). 2023 Jul 7;102(27):e33939. doi: 10.1097/MD.0000000000033939 (PMC10328622; doi:10.1097/md.0000000000033939), 2023-07-07
Supplement: medi-102-e33939-s002.pdf [file medi-102-e33939-s002.pdf]

## Supplemental Digital Content (Appendix). A detailed search strategy for PubMed

---

- #1 (“Neoplasms” [Mesh]) OR (Neoplasia [Title/Abstract]) OR (Neoplasias [Title/Abstract]) OR (Neoplasm [Title/Abstract]) OR (Tumors [Title/Abstract]) OR (Tumor [Title/Abstract]) OR (carcinoma [Title/Abstract]) OR (Cancer [Title/Abstract]) OR (Cancers [Title/Abstract]) OR (Malignancy [Title/Abstract]) OR (Malignancies [Title/Abstract]) OR (Malignant Neoplasms [Title/Abstract]) OR (Malignant Neoplasm [Title/Abstract]) OR (Neoplasm, Malignant [Title/Abstract]) OR (Neoplasms, Malignant [Title/Abstract])
- #2 (“Pain” [Mesh]) OR (Pain, Burning [Title/Abstract]) OR (Burning Pain [Title/Abstract]) OR (Burning Pains [Title/Abstract]) OR (Pains, Burning [Title/Abstract]) OR (Suffering, Physical [Title/Abstract]) OR (Physical Suffering [Title/Abstract]) OR (Physical Sufferings [Title/Abstract]) OR (Sufferings, Physical [Title/Abstract]) OR (Pain, Migratory [Title/Abstract]) OR (Migratory Pain [Title/Abstract]) OR (Migratory Pains [Title/Abstract]) OR (Pains, Migratory [Title/Abstract]) OR (Pain, Radiating [Title/Abstract]) OR (Pains, Radiating [Title/Abstract]) OR (Radiating Pain [Title/Abstract]) OR (Radiating Pains [Title/Abstract]) OR (Pain, Splitting [Title/Abstract]) OR (Pains, Splitting [Title/Abstract]) OR (Splitting Pain [Title/Abstract]) OR (Splitting Pains [Title/Abstract]) OR (Ache [Title/Abstract]) OR (Aches [Title/Abstract]) OR (Pain, Crushing [Title/Abstract]) OR (Crushing Pain [Title/Abstract]) OR (Crushing Pains [Title/Abstract]) OR (Pains, Crushing [Title/Abstract])
- #3 (“Massage” [Mesh]) OR (Zone Therapy [Title/Abstract]) OR (Therapies, Zone [Title/Abstract]) OR (Zone Therapies [Title/Abstract]) OR (Therapy, Zone [Title/Abstract]) OR (Massage Therapy [Title/Abstract]) OR (Massage Therapies [Title/Abstract]) OR (Therapies, Massage [Title/Abstract]) OR (Therapy, Massage [Title/Abstract]) OR (Drainage, Manual Lymphatic [Title/Abstract]) OR (Lymphatic Drainage, Manual [Title/Abstract]) OR (Manual Lymph Drainage [Title/Abstract]) OR (Drainage, Manual Lymph [Title/Abstract]) OR (Lymph Drainage, Manual [Title/Abstract]) OR (Lymphatic Drainage Massage [Title/Abstract]) OR (Drainage Massage, Lymphatic [Title/Abstract]) OR (Massage, Lymphatic Drainage [Title/Abstract]) OR (Shiatsu [Title/Abstract]) OR (Zhi Ya [Title/Abstract]) OR (Chih Ya [Title/Abstract]) OR (tuina [Title/Abstract]) OR (tui na [Title/Abstract]) OR (Manipulations, Musculoskeletal [Title/Abstract]) OR (Manipulation Therapy [Title/Abstract]) OR (Manipulative Therapies [Title/Abstract]) OR (Manipulative Therapy [Title/Abstract]) OR (Therapies, Manipulative [Title/Abstract]) OR (Therapy, Manipulative [Title/Abstract]) OR (Therapy, Manipulation [Title/Abstract]) OR (Manipulation Therapies [Title/Abstract]) OR

(Therapies, Manipulation[Title/Abstract]) OR (Reflexology[Title/Abstract]) OR  
(Bodywork[Title/Abstract]) OR (Bodyworks[Title/Abstract]) OR (Rolfing[Title/Abstract])  
OR (Craniosacral Massage[Title/Abstract]) OR (Massage, Craniosacral[Title/Abstract]) OR  
(Manual Therapies[Title/Abstract]) OR (Manual Therapy[Title/Abstract]) OR (Therapies,  
Manual[Title/Abstract]) OR (Therapy, Manual[Title/Abstract])

#4 (randomized controlled trial [publication type]) OR (randomized [Title/Abstract]) OR  
(placebo [Title/Abstract])

#5 #1 AND #2 AND #3 AND #4

---
